# Supplementary material
Source: PubMed Central journal article supplement (PMC1459360)

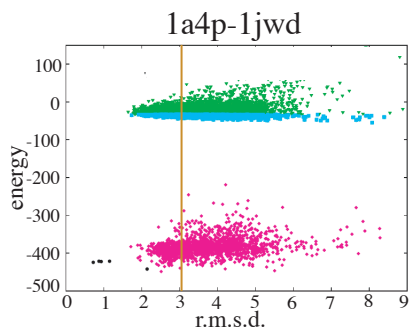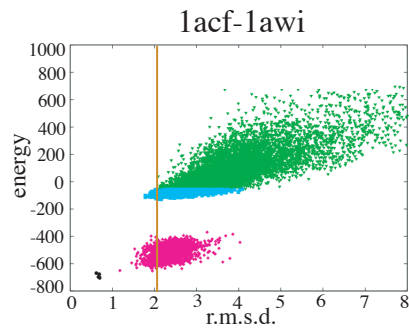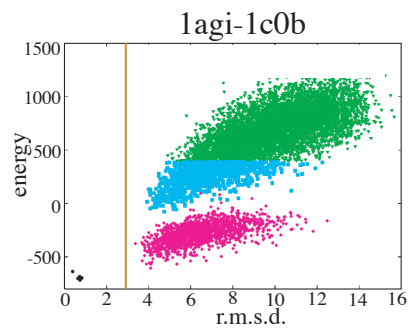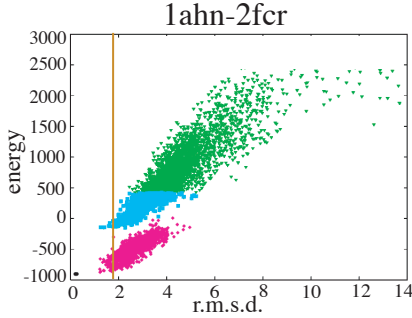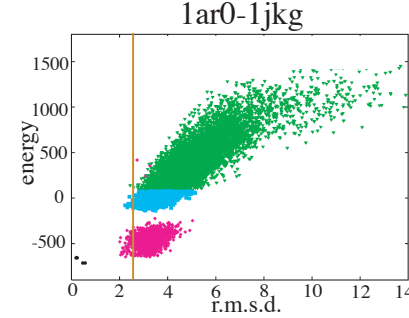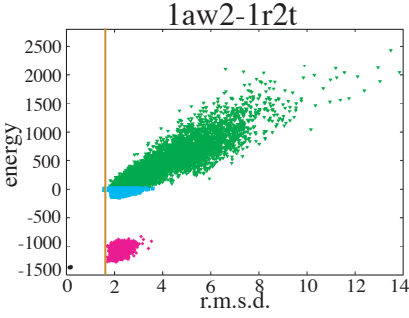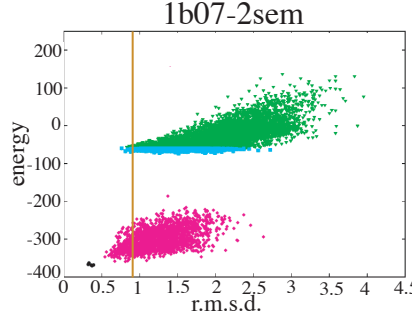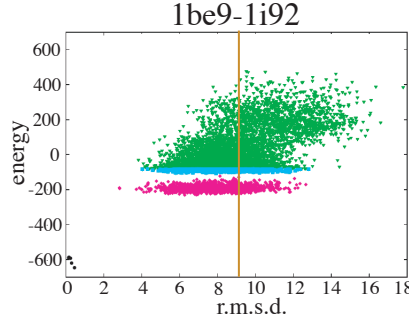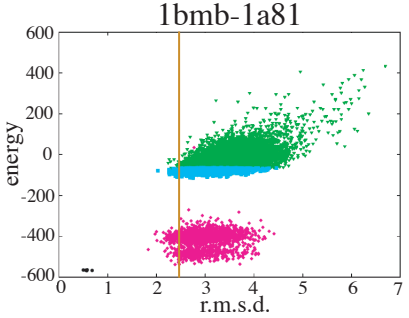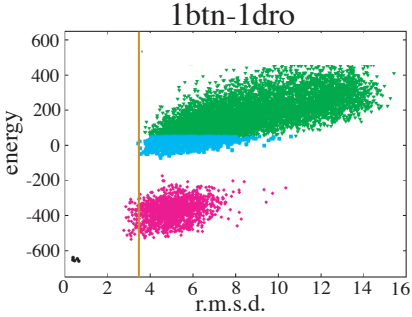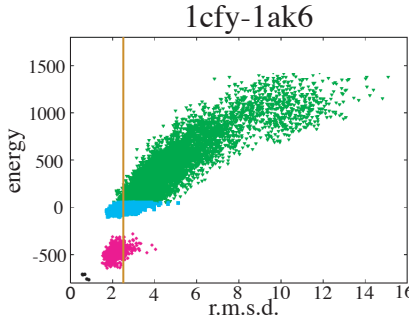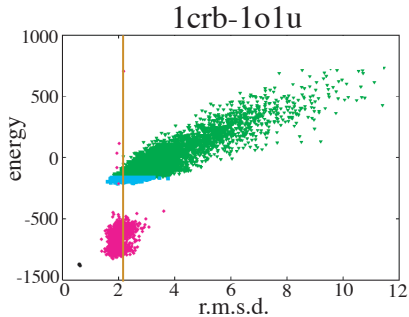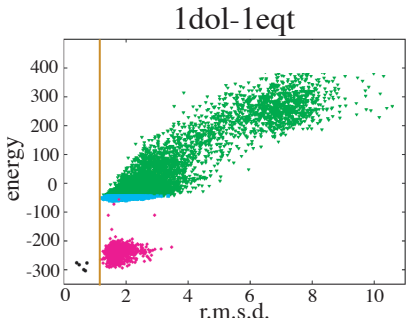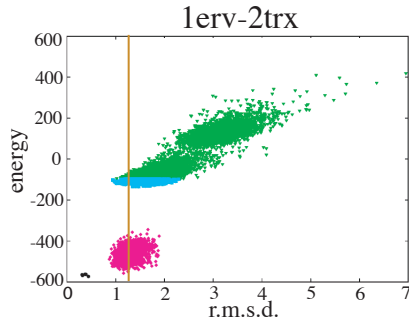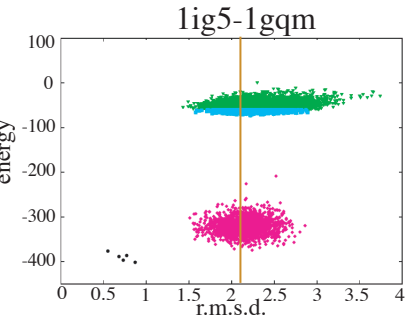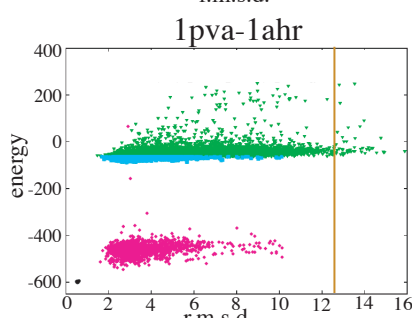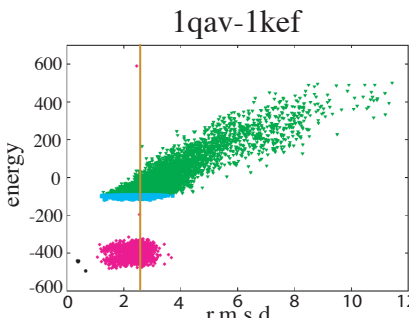

Supplement: pnas_0509355103_1.pdf [file pnas_0509355103_1.pdf]
